# Supplementary material for: Physical Activity and Its Diurnal Fluctuations Vary by Non-Motor Symptoms in Patients with Parkinson’s Disease: An Exploratory Study
Source: MDPI journal article supplement (doi:10.3390/healthcare10040749), 2022-04-18
Supplement: s1 [file s1]

## Supplementary

**Table S1.** Comparison of step counts with and non NMS by ANCOVA [step counts: continuous scale].

|                                             | With NMS |                   | Without NMS |                   | f-value | p-value |
|---------------------------------------------|----------|-------------------|-------------|-------------------|---------|---------|
|                                             | Mean     | SE                | Mean        | SE                |         |         |
| Cognitive impairment                        | -        | -                 | -           | -                 | -       | -       |
| Hallucinations and psychosis                | -        | -                 | -           | -                 | -       | -       |
| Depressed mood                              |          |                   |             |                   |         |         |
| Anxious mood                                | -        | -                 | -           | -                 | -       | -       |
| Apathy                                      | -        | -                 | -           | -                 | -       | -       |
| Features of dopamine dysregulation syndrome | -        | -                 | -           | -                 | -       | -       |
| Sleep problems                              | 4359.34  | (3237.50–5481.18) | 4670.03     | (3796.58–5543.48) | 0.19    | 0.66    |
| Daytime sleepiness                          | 4363.43  | (3117.11–5609.75) | 4657.06     | (3761.12–5553.00) | 0.14    | 0.71    |
| Pain and other sensations                   | 3600.18  | (2670.11–4530.25) | 5463.72     | (4555.30–6372.15) | 7.92    | <0.01   |
| Urinary problems                            | 4707.82  | (3436.60–5679.04) | 4482.58     | (3641.41–5323.76) | 0.09    | 0.77    |
| Constipation problems                       | 4501.12  | (3566.28–5436.02) | 4629.95     | (3456.57–5801.35) | 0.03    | 0.87    |
| Light-headedness on standing                | -        | -                 | -           | -                 | -       | -       |
| Fatigue                                     | 3225.07  | (2161.08–4289.06) | 5358.69     | (4546.59–6170.80) | 9.62    | <0.01   |

95% CI, 95% confidence interval of mean; NMS, non-motor symptoms. The covariate controlled for age, gender, and the mHY stage.

**Table S2.** Association between MVPA and NMS by logistic regression analysis [dependent variable: insufficient MVPA (< 150 min/week)].

|                                             | Crude model |              |         | Adjusted model |              |         |
|---------------------------------------------|-------------|--------------|---------|----------------|--------------|---------|
|                                             | OR          | 95% CI       | p-value | OR             | 95% CI       | p-value |
| Cognitive impairment                        | -           | -            | -       | -              | -            | -       |
| Hallucinations and psychosis                | -           | -            | -       | -              | -            | -       |
| Depressed mood                              | 1.65        | (0.32–8.39)  | 0.55    | 0.69           | (0.83–5.79)  | 0.74    |
| Anxious mood                                | -           | -            | -       | -              | -            | -       |
| Apathy                                      | -           | -            | -       | -              | -            | -       |
| Features of dopamine dysregulation syndrome | -           | -            | -       | -              | -            | -       |
| Sleep problems                              | 1.03        | (0.31–3.43)  | 0.97    | 1.17           | (0.24–5.75)  | 0.84    |
| Daytime sleepiness                          | 6.67        | (1.68–26.45) | <0.01   | 3.61           | (0.67–19.37) | 0.13    |
| Pain and other sensations                   | 4.00        | (1.16–13.86) | 0.03    | 5.93           | (0.99–35.69) | 0.05    |
| Urinary problems                            | 1.85        | (0.52–6.62)  | 0.35    | 8.24           | (0.24–8.24)  | 0.70    |
| Constipation problems                       | 3.78        | (1.05–13.68) | 0.04    | 10.17          | (1.26–82.31) | 0.03    |
| Light-headedness on standing                | -           | -            | -       | -              | -            | -       |
| Fatigue                                     | 5.07        | (1.37–18.79) | 0.02    | 10.13          | (1.39–73.82) | 0.02    |

OR, odds ratio; 95% CI, 95% confidence interval of odds ratio; MVPA, moderate-to-vigorous physical activity; NMS, non-motor symptoms. The adjusted model statistically controlled for age, gender, and the mHY stage.

**Table S3.** Association between LPA and non-motor symptoms by linear regression analysis (dependent variable: log-transformed LPA).

|                                             | Crude model |                    |                 | Adjusted model |                    |                 |
|---------------------------------------------|-------------|--------------------|-----------------|----------------|--------------------|-----------------|
|                                             | CE          | 95% CI             | <i>p</i> -value | CE             | 95% CI             | <i>p</i> -value |
| Cognitive impairment                        | -75.04      | ( -176.86, 26.77)  | 0.14            | -30.36         | ( -108.96, 48.25)  | 0.44            |
| Hallucinations and psychosis                | -7.85       | ( -150.10, 134.40) | 0.91            | 37.58          | ( -68.60, 143.76)  | 0.48            |
| Depressed mood                              | 49.82       | ( -46.90, 146.53)  | 0.16            | 48.79          | ( -24.83, 122.40)  | 0.19            |
| Anxious mood                                | -8.00       | ( -128.35, 112.35) | 0.89            | 30.96          | ( -60.07, 121.99)  | 0.50            |
| Apathy                                      | 80.68       | ( -41.53, 202.89)  | 0.19            | 41.76          | ( -52.65, 136.17)  | 0.38            |
| Features of dopamine dysregulation syndrome | -16.00      | ( -256.71, 224.71) | 0.89            | 61.92          | ( -120.13, 243.97) | 0.50            |
| Sleep problems                              | 6.42        | ( -66.76, 79.59)   | 0.86            | -0.83          | ( -54.80, 53.14)   | 0.98            |
| Daytime sleepiness                          | 64.48       | ( -6.96, 135.92)   | 0.08            | 31.51          | ( -28.70, 91.73)   | 0.30            |
| Pain and other sensations                   | -11.67      | ( -82.58, 59.23)   | 0.74            | -42.05         | ( -95.78, 11.68)   | 0.12            |
| Urinary problems                            | -31.44      | ( -107.48, 44.61)  | 0.41            | -28.06         | ( -86.07, 29.95)   | 0.33            |
| Constipation problems                       | -3.57       | ( -75.99, 68.87)   | 0.92            | 15.03          | ( -44.47, 74.53)   | 0.61            |
| Light-headedness on standing                | 35.81       | ( -136.04, 207.67) | 0.68            | 67.76          | ( -57.89, 193.41)  | 0.28            |
| Fatigue                                     | 75.44       | ( 6.01, 114.86)    | 0.03            | 39.80          | ( -17.35, 96.96)   | 0.17            |

CE, coefficient estimate; 95% CI, 95% confidence interval of coefficient estimate; LPA, light physical activity; NMS, non-motor symptoms. The adjusted model statistically controlled for age, gender, and the mHY stage.

**Table S4.** Association between SB and NMS by linear regression analysis (dependent variable: log-transformed SB).

|                                             | Crude model |                   |                 | Adjusted model |                   |                 |
|---------------------------------------------|-------------|-------------------|-----------------|----------------|-------------------|-----------------|
|                                             | CE          | 95% CI            | <i>p</i> -value | CE             | 95% CI            | <i>p</i> -value |
| Cognitive impairment                        | -0.97       | (-72.97, 71.03)   | 0.98            | 1.89           | (-74.85, 78.63)   | 0.96            |
| Hallucinations and psychosis                | -8.25       | (-106.34, 89.84)  | 0.87            | -9.59          | (-113.07, 93.91)  | 0.85            |
| Depressed mood                              | -63.72      | (-128.35, 0.90)   | 0.05            | -69.43         | (-138.88, 0.02)   | 0.05            |
| Anxious mood                                | -10.13      | (-93.10, 72.83)   | 0.81            | -9.42          | (-98.09, 79.24)   | 0.83            |
| Apathy                                      | 2.43        | (-83.574, 88.432) | 0.96            | 3.77           | (-88.61, 96.15)   | 0.94            |
| Features of dopamine dysregulation syndrome | -20.27      | (-186.19, 145.66) | 0.81            | -18.85         | (-196.18, 158.49) | 0.83            |
| Sleep problems                              | -37.83      | (-86.96, 11.29)   | 0.13            | -37.24         | (-88.16, 13.69)   | 0.15            |
| Daytime sleepiness                          | -14.23      | (-65.17, 36.72)   | 0.58            | -14.75         | (-73.72, 44.22)   | 0.62            |
| Pain and other sensations                   | 51.72       | (5.41, 98.03)     | 0.03            | 53.56          | (2.70, 104.42)    | 0.04            |
| Urinary problems                            | -37.79      | (-89.36, 13.89)   | 0.15            | -42.36         | (-97.60, 12.88)   | 0.13            |
| Constipation problems                       | -34.60      | (-83.41, 14.22)   | 0.16            | -49.97         | (-105.56, 5.62)   | 0.08            |
| Light-headedness on standing                | -71.07      | (-187.82, 45.67)  | 0.23            | -76.37         | (-197.48, 44.74)  | 0.21            |
| Fatigue                                     | -10.91      | (-61.28, 39.46)   | 0.66            | -5.26          | (-61.98, 51.45)   | 0.85            |

CE, coefficient estimate; 95% CI, 95% confidence interval of coefficient estimate; SB, sedentary behavior; NMS, non-motor symptoms. The adjusted model statistically controlled for age, gender, and the mHY stage.
